# Supplementary material
Source: publisher figshare collection journal article supplement (https://sage.figshare.com/ndownloader/files/16356842)
Supplement: Supplementary file 1 [file 16356842]

Appendix A Main Effects of Parent Gender (with Father as a Reference Category) and Interaction Effects with Posttest and Follow-up

|                               | <i>B (SE)</i> | <i>F</i> | Cohen's <i>d</i> |                                | <i>B (SE)</i> | <i>F</i> | Cohen's <i>d</i> |
|-------------------------------|---------------|----------|------------------|--------------------------------|---------------|----------|------------------|
| <b>Mind-mindedness</b>        |               |          |                  | <b>Externalizing problems</b>  |               |          |                  |
| Father                        | -0.03 (0.03)  | 1.57     | -0.23            | Father                         | -2.32 (1.23)  | 3.56     | -0.22            |
| Father <sup>x</sup> posttest  | 0.01 (0.04)   | 0.06     | 0.06             | Father <sup>x</sup> posttest   | 2.10 (1.70)   | 1.16     | 0.16             |
| Father <sup>x</sup> follow-up | 0.02 (0.04)   | 0.25     | 0.12             | Father <sup>x</sup> follow-up  | 1.09 (1.77)   | 1.26     | 0.17             |
| <b>Positive MM</b>            |               |          |                  | <b>Internalizing problems</b>  |               |          |                  |
| Father                        | -0.01 (0.02)  | 0.24     | -0.09            | Father                         | -3.60 (1.38)  | 6.77**   | -0.35            |
| Father <sup>x</sup> posttest  | -0.01 (0.03)  | 0.00     | -0.00            | Father <sup>x</sup> posttest   | 0.19 (1.70)   | 0.01     | 0.02             |
| Father <sup>x</sup> follow-up | -0.01 (0.03)  | 0.03     | -0.04            | Father <sup>x</sup> follow-up  | 1.96 (1.69)   | 1.36     | 0.19             |
| <b>Negative MM</b>            |               |          |                  | <b>Avoidant attachment</b>     |               |          |                  |
| Father                        | -0.02 (0.02)  | 1.27     | -0.21            | Father                         | 2.24 (0.89)   | 6.29**   | 0.39             |
| Father <sup>x</sup> posttest  | 0.01 (0.02)   | 0.24     | 0.12             | Father <sup>x</sup> posttest   | -0.13 (1.10)  | 0.02     | -0.02            |
| Father <sup>x</sup> follow-up | 0.01 (0.02)   | 0.30     | 0.14             | Father <sup>x</sup> follow-up  | -0.32 (1.18)  | 0.07     | -0.05            |
| <b>Sensitivity</b>            |               |          |                  | <b>Ambivalent attachment</b>   |               |          |                  |
| Father                        | 0.07 (0.16)   | 0.00     | 0.06             | Father                         | -1.68 (0.79)  | 4.52*    | -0.35            |
| Father <sup>x</sup> posttest  | 0.21 (0.20)   | 1.06     | 0.18             | Father <sup>x</sup> posttest   | 1.63 (0.88)   | 3.40     | 0.34             |
| Father <sup>x</sup> follow-up | -0.18 (0.20)  | 0.84     | -0.16            | Father <sup>x</sup> follow-up  | 1.88 (0.95)   | 2.97†    | 0.32             |
| <b>Parenting Stress</b>       |               |          |                  | <b>Disorganized attachment</b> |               |          |                  |
| Father                        | -3.48 (1.49)  | 5.41*    | -0.38            | Father                         | -1.52 (0.77)  | 4.43*    | -0.30            |
| Father <sup>x</sup> posttest  | 2.20 (1.47)   | 2.23     | 0.24             | Father <sup>x</sup> posttest   | 0.20 (0.77)   | 0.07     | 0.04             |
| Father <sup>x</sup> follow-up | 1.93 (1.53)   | 1.60     | 0.21             | Father <sup>x</sup> follow-up  | 0.18 (0.83)   | 0.05     | 0.03             |

*Note.* MM = mind-mindedness, B = the unstandardized parameter coefficient of the posttest and follow-up relative to the pretest, SE = standard error of parameter estimate, † =  $p < .1$ , \* =  $p < .05$ , \*\* =  $p < .01$ , \*\*\* =  $p < .001$ . The label Father presents main effects of fathers compared to mother, taken all measurement times together. The label Father x posttest indicates whether the pre- to posttest changes were different for fathers compared to mothers, the label Father x follow-up indicates whether effects were the pretest to follow-up changes were different for fathers compared to mothers
